# Supplementary material for: Effect of water activity on rates of serpentinization of olivine
Source: PubMed Central journal article supplement (PMC5594423; doi:10.1038/ncomms16107), 2017-07-14
Supplement: ncomms16107-s1.pdf [file ncomms16107-s1.pdf]

File name: Supplementary Information

Description: Supplementary Tables

File name: Supplementary Data 1

Description: All the data from the experimental runs. FPD, salinity and H<sub>2</sub>O consumed.

File name: Supplementary Data 2

Description: Step by step methodology to calculate the amount of H<sub>2</sub>O consumed from the FPD observations.

File name: Peer Review File

Description:

**Supplementary Table 1 | Electron microprobe analysis of the olivine host.**

|                  | Concentration<br>(wt.%) |
|------------------|-------------------------|
| SiO <sub>2</sub> | 40.67                   |
| MgO              | 50.03                   |
| CaO              | 0.05                    |
| MnO              | 0.126                   |
| FeO              | 8.66                    |
| <u>NiO</u>       | <u>0.37</u>             |
| Total            | 99.92                   |
| <b>Mg #</b>      | <b>85*</b>              |

$$*Mg\# = \left( \frac{MgO}{MgO+FeO} \right) \times 100$$

**Supplementary Table 2 | TOF-SIMS data and composition of the reaction products of the SFI shown in Figures 2 and 3. The areas refer to the areas highlighted in the fluid inclusion shown in Figure 3.**

| Elements <sup>a</sup> | Region I        |                 | Region II       |            | Region III      |            | Region IV       |            | Region V        |            | Region VI       |         | Region VII      |            |
|-----------------------|-----------------|-----------------|-----------------|------------|-----------------|------------|-----------------|------------|-----------------|------------|-----------------|---------|-----------------|------------|
|                       | Olivine         | Brucite         | Olivine         | Serpentine | Olivine         | Serpentine | Olivine         | Serpentine | Olivine         | Serpentine | Olivine         | Brucite | Olivine         | Serpentine |
| Na+                   | 615             | 53677           | 1554            | 37148      | 1155            | 38146      | 1209            | 36086      | 985             | 82079      | 453             | 3165    | 2330            | 18358      |
| <sup>25</sup> Mg+     | 146296          | 103126          | 305704          | 80630      | 369753          | 14684      | 162388          | 112338     | 111957          | 116932     | 141797          | 9493    | 542468          | 74543      |
| Si+                   | 52707           | 65267           | 152903          | 56945      | 231141          | 8658       | 60456           | 57906      | 29471           | 34329      | 81683           | 6756    | 280256          | 54682      |
| Fe+                   | 47829           | 30132           | 107244          | 20184      | 144535          | 3831       | 52901           | 30230      | 43481           | 29408      | 52226           | 3039    | 192260          | 20500      |
| Mg/Mg+Fe              | 0.75            | 0.77            | 0.74            | 0.80       | 0.72            | 0.79       | 0.75            | 0.79       | 0.72            | 0.80       | 0.73            | 0.76    | 0.74            | 0.78       |
| Mg #                  | 85 <sup>b</sup> | 87 <sup>c</sup> | 85 <sup>b</sup> | 92         | 85 <sup>b</sup> | 94         | 85 <sup>b</sup> | 90         | 85 <sup>b</sup> | 94         | 85 <sup>b</sup> | 88      | 85 <sup>b</sup> | 90         |

<sup>a</sup>TOF-SIMS data units are expressed in counts generated per ROI (region of interest).

<sup>b</sup>Mg # of the olivine was calculated from the EMPA data of Supplementary Table 1.

<sup>c</sup>Mg# of the ROI calculated from the cross-multiplication of the <sup>25</sup>Mg/(<sup>25</sup>Mg+Fe) ratios and the Mg# of the host. The mineralogy of the ROI was previously identified by Raman (Fig. 2).

**Supplementary Table 3 | Rates of reaction, fluxes, activities, and residual data for individual SFIs from the experiments with starting compositions of H<sub>2</sub>O-NaCl-MgCl<sub>2</sub> (Na/Mg 8:1).**

| Salinity (wt.%) | SFI     | r (mol/sec) | J (mol/m <sup>2</sup> sec) | log r  | log J | a <sub>H<sub>2</sub>O</sub> | log a <sub>H<sub>2</sub>O</sub> | log J Residuals* | ξ    |
|-----------------|---------|-------------|----------------------------|--------|-------|-----------------------------|---------------------------------|------------------|------|
| 1               | FIA 1A  | 9.56E-18    | 3.04E-08                   | -17.02 | -7.52 | 0.995                       | -0.0021                         | -0.103           | 0.54 |
| 1               | FIA 1B  | 8.10E-18    | 2.58E-08                   | -17.09 | -7.59 | 0.995                       | -0.0021                         | -0.175           | 0.45 |
| 1               | FIA 1C  | 7.49E-18    | 2.39E-08                   | -17.13 | -7.62 | 0.995                       | -0.0021                         | -0.209           | 0.54 |
| 1               | FIA 1D  | 8.90E-18    | 2.83E-08                   | -17.05 | -7.55 | 0.995                       | -0.0021                         | -0.134           | 0.50 |
| 1               | FIA 1E  | 8.90E-18    | 2.83E-08                   | -17.05 | -7.55 | 0.995                       | -0.0021                         | -0.134           | 0.50 |
| 1               | FIA 1F  | 9.56E-18    | 3.04E-08                   | -17.02 | -7.52 | 0.995                       | -0.0021                         | -0.103           | 0.54 |
| 1               | FIA 1G  | 6.03E-18    | 1.92E-08                   | -17.22 | -7.72 | 0.995                       | -0.0021                         | -0.303           | 0.45 |
| 1               | FIA 1H  | 8.90E-18    | 2.83E-08                   | -17.05 | -7.55 | 0.995                       | -0.0021                         | -0.134           | 0.50 |
| 1               | FIA 1I  | 8.90E-18    | 2.83E-08                   | -17.05 | -7.55 | 0.995                       | -0.0021                         | -0.134           | 0.50 |
| 3.5             | FIA 1A  | 4.23E-18    | 1.35E-08                   | -17.37 | -7.87 | 0.984                       | -0.0069                         | 0.120            | 0.48 |
| 3.5             | FIA 1B  | 3.70E-18    | 1.18E-08                   | -17.43 | -7.93 | 0.984                       | -0.0069                         | 0.062            | 0.41 |
| 3.5             | FIA 1D  | 1.76E-18    | 5.60E-09                   | -17.75 | -8.25 | 0.984                       | -0.0069                         | -0.261           | 0.16 |
| 3.5             | FIA 1H  | 2.23E-18    | 7.09E-09                   | -17.65 | -8.15 | 0.984                       | -0.0069                         | -0.159           | 0.29 |
| 3.5             | FIA 1I  | 2.46E-18    | 7.84E-09                   | -17.61 | -8.11 | 0.984                       | -0.0069                         | -0.115           | 0.16 |
| 3.5             | FIA 2C  | 4.00E-18    | 1.27E-08                   | -17.40 | -7.89 | 0.984                       | -0.0069                         | 0.096            | 0.16 |
| 3.5             | FIA 2D  | 6.03E-18    | 1.92E-08                   | -17.22 | -7.72 | 0.984                       | -0.0069                         | 0.274            | 0.16 |
| 3.5             | FIA 2E  | 5.45E-18    | 1.74E-08                   | -17.26 | -7.76 | 0.984                       | -0.0069                         | 0.230            | 0.34 |
| 3.5             | FIA 3A  | 3.31E-18    | 1.05E-08                   | -17.48 | -7.98 | 0.984                       | -0.0069                         | 0.013            | 0.36 |
| 3.5             | FIA 3B  | 3.81E-18    | 1.21E-08                   | -17.42 | -7.92 | 0.984                       | -0.0069                         | 0.075            | 0.16 |
| 3.5             | FIA 3C  | 3.03E-18    | 9.66E-09                   | -17.52 | -8.02 | 0.984                       | -0.0069                         | -0.024           | 0.16 |
| 3.5             | FIA 3D  | 3.84E-18    | 1.22E-08                   | -17.42 | -7.91 | 0.984                       | -0.0069                         | 0.078            | 0.48 |
| 3.5             | FIA 3E  | 4.14E-18    | 1.32E-08                   | -17.38 | -7.88 | 0.984                       | -0.0069                         | 0.110            | 0.34 |
| 3.5             | FIA 3G  | 3.22E-18    | 1.03E-08                   | -17.49 | -7.99 | 0.984                       | -0.0069                         | 0.002            | 0.32 |
| 3.5             | FIA 3H  | 3.14E-18    | 1.00E-08                   | -17.50 | -8.00 | 0.984                       | -0.0069                         | -0.009           | 0.44 |
| 3.5             | FIA 3I  | 3.44E-18    | 1.10E-08                   | -17.46 | -7.96 | 0.984                       | -0.0069                         | 0.030            | 0.54 |
| 3.5             | FIA 3J  | 3.79E-18    | 1.21E-08                   | -17.42 | -7.92 | 0.984                       | -0.0069                         | 0.072            | 0.48 |
| 3.5             | FIA 3K  | 3.72E-18    | 1.19E-08                   | -17.43 | -7.93 | 0.984                       | -0.0069                         | 0.065            | 0.52 |
| 3.5             | FIA 3L  | 5.03E-18    | 1.60E-08                   | -17.30 | -7.80 | 0.984                       | -0.0069                         | 0.195            | 0.50 |
| 3.5             | FIA 3M  | 5.04E-18    | 1.60E-08                   | -17.30 | -7.79 | 0.984                       | -0.0069                         | 0.196            | 0.29 |
| 3.5             | FIA 3N  | 4.84E-18    | 1.54E-08                   | -17.31 | -7.81 | 0.984                       | -0.0069                         | 0.179            | 0.51 |
| 3.5             | FIA 3O  | 2.27E-18    | 7.23E-09                   | -17.64 | -8.14 | 0.984                       | -0.0069                         | -0.150           | 0.49 |
| 3.5             | FIA 3P  | 2.66E-18    | 8.48E-09                   | -17.57 | -8.07 | 0.984                       | -0.0069                         | -0.081           | 0.50 |
| 3.5             | FIA 3Q  | 2.18E-18    | 6.94E-09                   | -17.66 | -8.16 | 0.984                       | -0.0069                         | -0.168           | 0.51 |
| 3.5             | FIA 3R  | 3.90E-18    | 1.24E-08                   | -17.41 | -7.91 | 0.984                       | -0.0069                         | 0.085            | 0.53 |
| 3.5             | FIA 3S  | 4.45E-18    | 1.42E-08                   | -17.35 | -7.85 | 0.984                       | -0.0069                         | 0.142            | 0.49 |
| 3.5             | FIA 3T  | 3.42E-18    | 1.09E-08                   | -17.47 | -7.96 | 0.984                       | -0.0069                         | 0.028            | 0.52 |
| 3.5             | FIA 3U  | 3.71E-18    | 1.18E-08                   | -17.43 | -7.93 | 0.984                       | -0.0069                         | 0.063            | 0.49 |
| 3.5             | FIA 3Y  | 4.97E-18    | 1.58E-08                   | -17.30 | -7.80 | 0.984                       | -0.0069                         | 0.190            | 0.28 |
| 3.5             | FIA 3Z  | 3.03E-18    | 9.66E-09                   | -17.52 | -8.01 | 0.984                       | -0.0069                         | -0.024           | 0.33 |
| 3.5             | FIA 3AB | 4.33E-18    | 1.38E-08                   | -17.36 | -7.86 | 0.984                       | -0.0069                         | 0.130            | 0.20 |
| 3.5             | FIA 3AC | 4.86E-18    | 1.55E-08                   | -17.31 | -7.81 | 0.984                       | -0.0069                         | 0.180            | 0.35 |
| 3.5             | FIA 3AE | 2.66E-18    | 8.48E-09                   | -17.57 | -8.07 | 0.984                       | -0.0069                         | -0.081           | 0.48 |
| 3.5             | FIA 4A  | 4.56E-18    | 1.45E-08                   | -17.34 | -7.84 | 0.984                       | -0.0069                         | 0.153            | 0.43 |
| 3.5             | FIA 4D  | 3.84E-18    | 1.22E-08                   | -17.42 | -7.91 | 0.984                       | -0.0069                         | 0.079            | 0.43 |
| 3.5             | FIA 4E  | 3.70E-18    | 1.18E-08                   | -17.43 | -7.93 | 0.984                       | -0.0069                         | 0.062            | 0.12 |
| 3.5             | FIA 4F  | 2.56E-18    | 8.17E-09                   | -17.59 | -8.09 | 0.984                       | -0.0069                         | -0.097           | 0.10 |
| 3.5             | FIA 4G  | 1.92E-18    | 6.11E-09                   | -17.72 | -8.21 | 0.984                       | -0.0069                         | -0.223           | 0.12 |
| 6               | FIA 1A  | 1.04E-18    | 3.32E-09                   | -17.98 | -8.48 | 0.974                       | -0.0116                         | 0.077            | 0.26 |
| 6               | FIA 1B  | 1.18E-18    | 3.75E-09                   | -17.93 | -8.43 | 0.974                       | -0.0116                         | 0.130            | 0.12 |
| 6               | FIA 1E  | 9.81E-19    | 3.12E-09                   | -18.01 | -8.51 | 0.974                       | -0.0116                         | 0.051            | 0.07 |
| 6               | FIA 1F  | 1.08E-18    | 3.45E-09                   | -17.97 | -8.46 | 0.974                       | -0.0116                         | 0.093            | 0.03 |
| 6               | FIA 1G  | 9.36E-19    | 2.98E-09                   | -18.03 | -8.53 | 0.974                       | -0.0116                         | 0.030            | 0.25 |
| 6               | FIA 1H  | 9.35E-19    | 2.98E-09                   | -18.03 | -8.53 | 0.974                       | -0.0116                         | 0.030            | 0.28 |
| 6               | FIA 1I  | 1.10E-18    | 3.51E-09                   | -17.96 | -8.46 | 0.974                       | -0.0116                         | 0.101            | 0.33 |
| 6               | FIA 2A  | 1.23E-18    | 3.92E-09                   | -17.91 | -8.41 | 0.974                       | -0.0116                         | 0.149            | 0.24 |
| 6               | FIA 2C  | 9.82E-19    | 3.13E-09                   | -18.01 | -8.50 | 0.974                       | -0.0116                         | 0.051            | 0.29 |
| 6               | FIA 2H  | 1.11E-18    | 3.53E-09                   | -17.96 | -8.45 | 0.974                       | -0.0116                         | 0.103            | 0.16 |
| 10              | FI A    | 6.80E-20    | 2.17E-10                   | -19.17 | -9.66 | 0.958                       | -0.0187                         | -0.254           | 0.05 |
| 10              | FI B    | 6.80E-20    | 2.17E-10                   | -19.17 | -9.66 | 0.958                       | -0.0187                         | -0.254           | 0.05 |
| 10              | FI C    | 1.33E-19    | 4.22E-10                   | -18.88 | -9.37 | 0.958                       | -0.0187                         | 0.035            | 0.09 |
| 10              | FI D    | 8.38E-20    | 2.67E-10                   | -19.08 | -9.57 | 0.958                       | -0.0187                         | -0.163           | 0.06 |
| 10              | FI K    | 1.18E-19    | 3.74E-10                   | -18.93 | -9.43 | 0.958                       | -0.0187                         | -0.017           | 0.08 |
| 10              | FI L    | 6.80E-20    | 2.17E-10                   | -19.17 | -9.66 | 0.958                       | -0.0187                         | -0.254           | 0.05 |

\*These data represent the difference from the measured log J and the value predicted by the rate equation (Fig. 4A) in main text.

r is the rate of H<sub>2</sub>O consumption in moles per second.

J is the flux of H<sub>2</sub>O from the liquid phase into the product phases.

a is the activity of H<sub>2</sub>O obtained using Eq3/6 software.

ξ = Extent of reaction calculated from the fraction of H<sub>2</sub>O consumed.
